# Supplementary material for: Sloanea chocoana and S. pittieriana (Elaeocarpaceae): Chemical and Biological Studies of Ethanolic Extracts and Skincare Properties
Source: MDPI journal article supplement (doi:10.3390/plants12233953), 2023-11-24
Supplement: s1 [file s1]

## Supplementary Information

### ***Sloanea chocoana* and *S. pittieriana* (Elaeocarpaceae): Chemical and Biological Studies of Ethanolic Extracts and Skincare Properties**

Patricia Quintero-Rincón <sup>1,2</sup>, Nayive Pino-Benítez <sup>1,\*</sup>, Elkin Galeano <sup>3</sup>, Cris Rojo-Uribe <sup>4</sup>, Ana C. Mesa-Arango <sup>4</sup>  
and Oscar A. Flórez-Acosta <sup>2</sup>

<sup>1</sup> Natural Products Group, Universidad Tecnológica del Chocó, Quibdó 270002, Colombia; patriciaquintero@gmail.com

<sup>2</sup> Research Group Design and Formulation of Medicines, Cosmetics, and Related, Faculty of Pharmaceutical and Food Sciences, Universidad de Antioquia, Medellín 050010, Colombia; oscar.florez@udea.edu.co

<sup>3</sup> Bioactive Substances Research Group, Faculty of Pharmaceutical and Food Sciences, Universidad de Antioquia, Medellín 050010, Colombia; elkin.galeano@udea.edu.co

<sup>4</sup> Dermatological Research Group, Faculty of Medicine, Universidad de Antioquia, Medellín 050010, Colombia; cris.rojo@udea.edu.co (C.R.-U.); ana.mesa@udea.edu.co (A.C.M.-A.)

\* Correspondence: nayivepino@gmail.com; Tel.: +57-310-4559617

#### **Legends:**

**Supplementary Figure S1.** Representative GC-MS chromatogram of silylated ethanolic extract from *Sloanea chocoana* leaves.

**Supplementary Figure S2.** Representative GC-MS chromatogram of silylated ethanolic extract from *Sloanea pittieriana* leaves.

**Supplementary Table S1.** Some criteria for consideration of *in vitro* photoprotective potential.

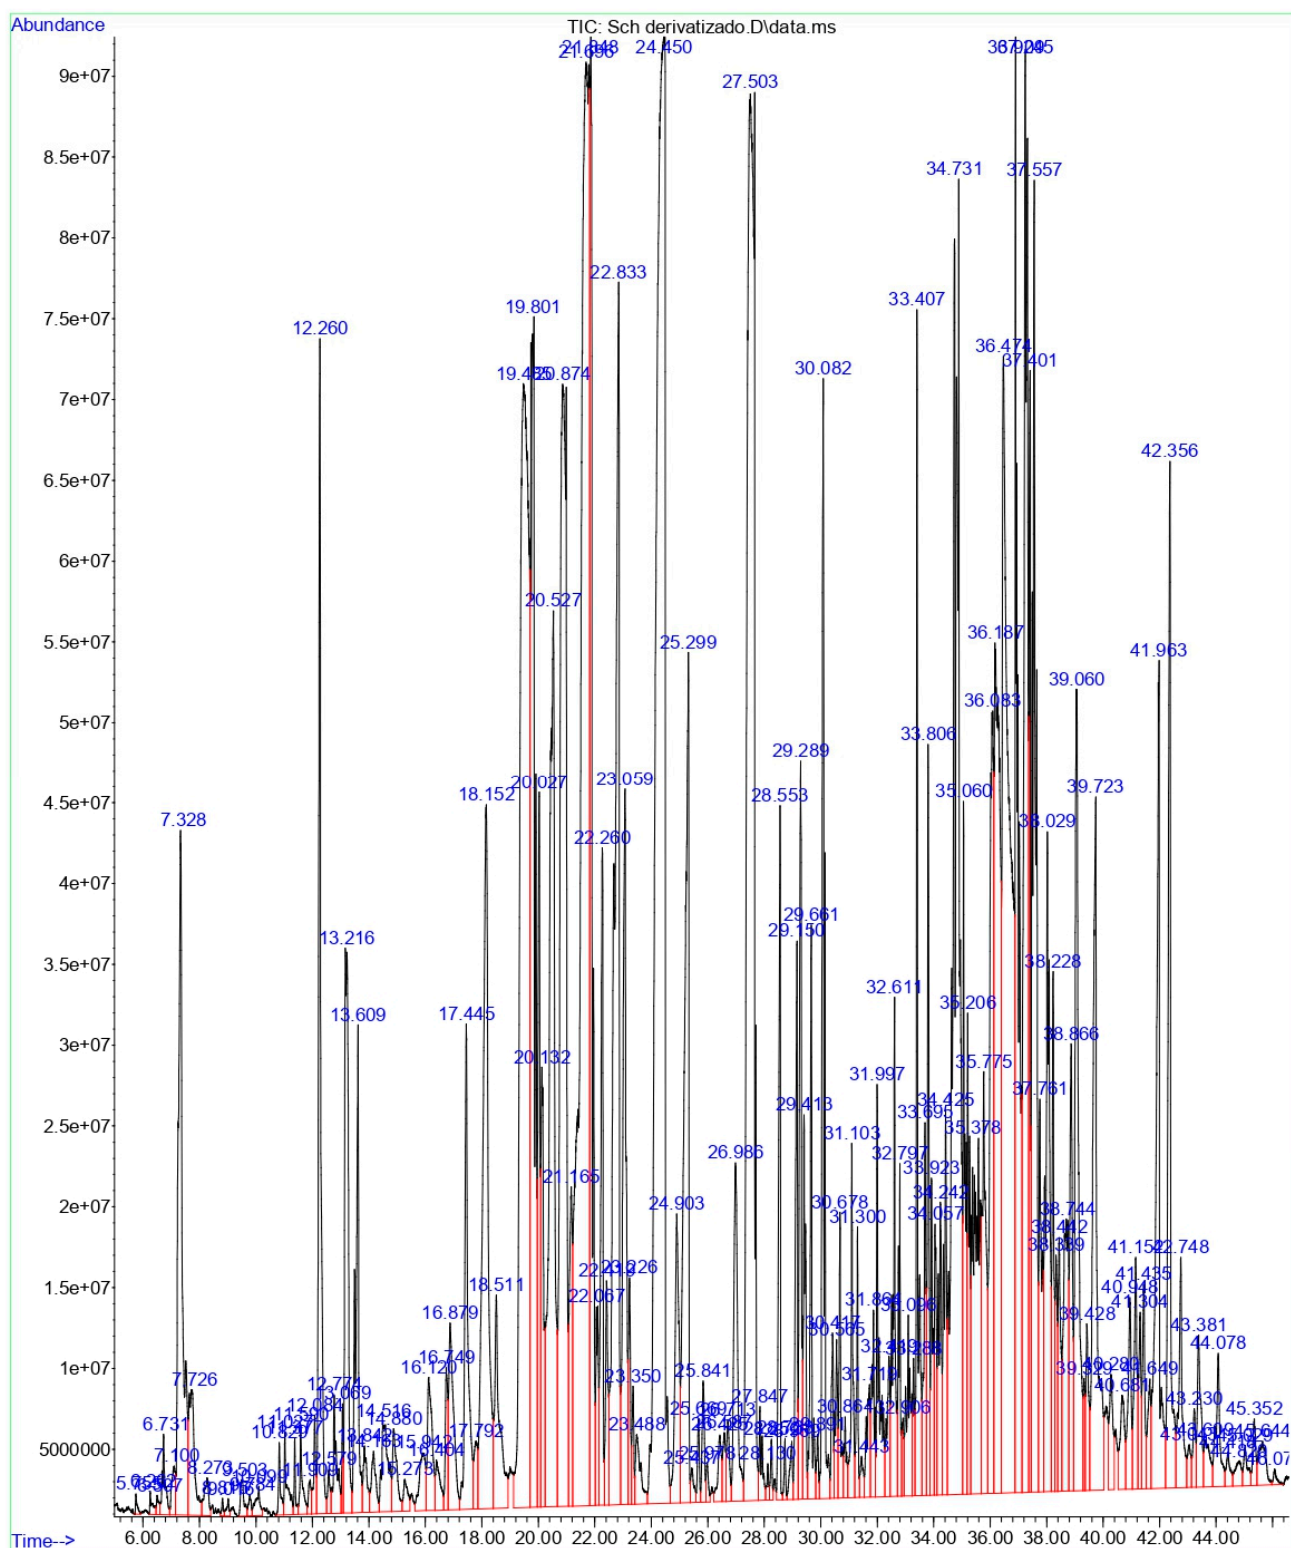

**Supplementary Figure S1.** Representative GC-MS chromatogram of silylated ethanolic extract from *Sloanea chocona* leaves.

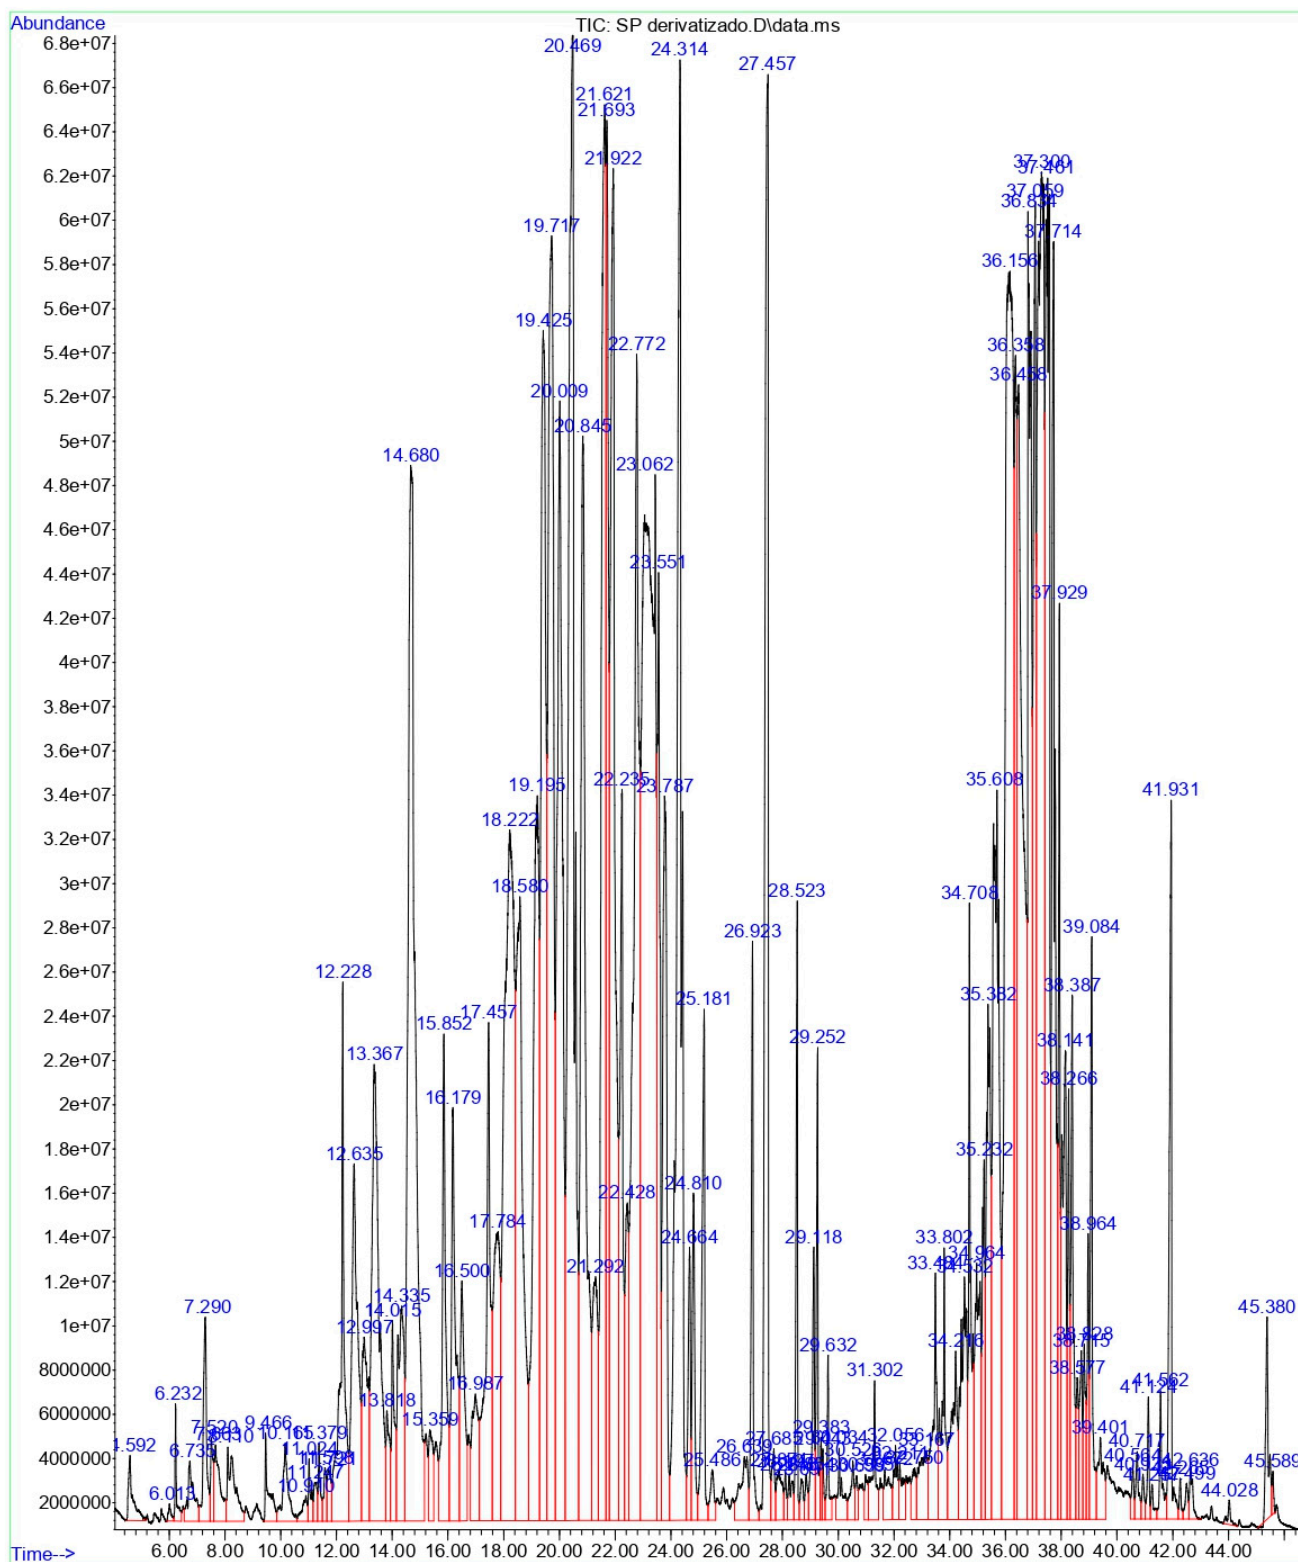

**Supplementary Figure S2.** Representative GC-MS chromatogram of silylated ethanolic extract from *Sloanea pittieriana* leaves.

**Supplementary Table S1.** Some criteria for consideration of in vitro photoprotective potential.

| No. | Evaluated Parameter                   | General Considerations <sup>a</sup>                                                                                                                                                                                                                                                                                                               | UV Protection Criteria                                                                                                                                                                                                                                       |
|-----|---------------------------------------|---------------------------------------------------------------------------------------------------------------------------------------------------------------------------------------------------------------------------------------------------------------------------------------------------------------------------------------------------|--------------------------------------------------------------------------------------------------------------------------------------------------------------------------------------------------------------------------------------------------------------|
| 1   | Sun Protective Factor (SPF)           | Absorbance is measured in the wavelength range 290 to 320 nm (UVB), using an optical path of 5.0 cm. To obtain the SPF values, the Mansur equation should be applied:<br><br>$SPF = CF \times \sum_{290 \text{ nm}}^{320 \text{ nm}} EE(\lambda) \times I(\lambda) \times Abs(\lambda)$                                                           | SPF 2-15 (low protection)<br>SPF 15-30 (moderate protection)<br>SPF 30-50 (high protection)<br>SPF >50 (maximum protection)                                                                                                                                  |
| 2   | Critical wavelength (λ <sub>c</sub> ) | Absorbance is measured in the wavelength range of 290 to 400 nm (UVA and UVB), using an optical path of 1.0 cm. To determine λ <sub>c</sub> values, the following equation is applied:<br><br>$\int_{290 \text{ nm}}^{\lambda_c} A(\lambda) d\lambda = 0.9 \int_{290 \text{ nm}}^{400 \text{ nm}} A(\lambda) d\lambda$                            | According to the FDA, a product is considered to have broad-spectrum protection when its minimum critical wavelength is ≥370 nm                                                                                                                              |
| 3   | UVA/UVB ratio                         | Absorbance is measured in the wavelength range of 290 to 400 nm (UVA and UVB), using an optical path of 5.0 cm. To determine the UVA/UVB ratio, the following equation is applied:<br><br>$\frac{UVA}{UVB} = \frac{\sum_{320 \text{ nm}}^{400 \text{ nm}} A(\lambda), d(\lambda)}{\sum_{290 \text{ nm}}^{320 \text{ nm}} A(\lambda), d(\lambda)}$ | The star rating system indicates that 0.0 to <0.2 is too low for UVA protection (-), 0.2 to <0.4 is a moderate protector (*), 0.4 to <0.6 is a good protector (**), 0.6 to <0.8 is a superior protector (***), and 0.8 to ≥0.8 is a maximum protector (****) |
| 4   | Transmission of erythema (%)          | Absorbance is measured in the wavelength range of 292 to 372 nm (UVA and UVB), using an optical path of 5.0 cm. It is necessary calculates transmission (T) using A = 1/ T = - log T. Then, the following equation is applied:<br><br>$\text{Transmission of erythema (\%)} = \frac{E_e}{\sum F_e} = \sum \frac{(T \times F_e)}{\sum F_e}$        | UV transmission range (%) <sup>b</sup><br>Sunscreen, <1<br>Extra protection, 1-6<br>Standard tan, 6-12<br>Quick tan, 10-18                                                                                                                                   |
| 5   | Transmission of pigmentation (%)      | Absorbance is measured in the wavelength range of 292 to 372 nm (UVA and UVB), using an optical path of 5.0 cm. It is necessary calculates transmission (T) using A = 1/ T = - log T. Then, the following equation is applied:<br><br>$\text{Transmission of pigmentation (\%)} = \frac{E_p}{\sum F_p} = \sum \frac{(T \times F_p)}{\sum F_p}$    | UV transmission range (%) <sup>b</sup><br>Sunscreen, 3-40<br>Extra protection, 42-86<br>Standard tan, 45-86<br>Quick tan, 45-86                                                                                                                              |

<sup>a</sup> A description detailed for each evaluated parameter is found in Quintero-Rincón et al. [13] and Caballero-Gallardo et al. [25].

<sup>b</sup> These values must be as low as possible to be considered sunscreen.
